# Supplementary material for: Anthropogenically induced environmental changes in the northeasternAdriatic Sea in the last 500 years (Panzano Bay, Gulf of Trieste)
Source: Copernicus journal article supplement (doi:10.5194/bg-13-5965-2016), 2016-11-01
Supplement: Supplementary file 1 [file bg-13-5965-2016-supplement.zip]

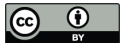

*Supplement of*

**Anthropogenically induced environmental changes in the northeastern Adriatic Sea in the last 500 years (Panzano Bay, Gulf of Trieste)**

**Jelena Vidović et al.**

*Correspondence to:* Jelena Vidović (vidovic.jelena@gmail.com)

- bg-13-5965-2016-supplement-title-page.pdf
- bg-2016-273-supplement-version4
  - Supplementary material\_final version
    - \* Fig S01.eps
    - \* Table S1.xls
    - \* Table S2.xls
    - \* Table S3.xls

The copyright of individual parts of the supplement might differ from the CC-BY 3.0 licence.
